# Supplementary material for: A Genome-Wide Association Study of Hypertension and Blood Pressure in African Americans
Source: PLoS Genet. 2009 Jul 17;5(7):e1000564. doi: 10.1371/journal.pgen.1000564 (PMC2702100; doi:10.1371/journal.pgen.1000564)
Supplement: Table S1 — Top scoring SNPs for association with hypertension as a dichotomous trait. (0.05 MB XLS) [file pgen.1000564.s002.xls]

## Sheet: HTN_1e-04
SNP	rank	P	chromosome	position	type	ancestral allele	closest gene	distance to gene	A1	MAF
rs9791170	1	5.1e-07	5	131597526	INTERGENIC	N/A	P4HA2	-6071	A	0.4336
rs2146204	2	2.97e-06	1	167140723	INTERGENIC	A	RP11-375F2.1;OTTHUMG00000034587	6422	C	0.08711
rs991316	3	3.45e-06	4	100541468	INTERGENIC	T	ADH7	10973	T	0.4512
rs7902529	4	6.14e-06	10	2288418	INTERGENIC	T	AL354747.12	56736	A	0.1406
rs1550576	5	1.03e-05	15	56000706	INTERGENIC	T	ALDH1A2	32214	T	0.1423
rs11714139	6	1.14e-05	3	133427327	INTERGENIC	A	ACPP	-91614	T	0.08112
rs11692045	7	1.54e-05	2	41804457	INTERGENIC	G	LDHAL3	-95910	C	0.4081
rs12748299	8	1.66e-05	1	197249947	INTERGENIC	C	AC096631.2	64368	C	0.1318
rs2665797	9	1.73e-05	17	59276217	UPSTREAM	N/A	SMARCD2	-2556	G	0.09467
rs11988036	10	1.95e-05	8	20184487	INTRONIC	A	LZTS1	0	T	0.2431
rs10231275	11	1.97e-05	7	29622353	INTERGENIC	N/A	AC007276.3	25162	T	0.04081
rs2654841	12	2.08e-05	4	100523944	INTERGENIC	C	ADH7	28497	T	0.4936
rs7677400	13	2.09e-05	4	87471821	INTRONIC	T	MAPK10	0	C	0.1293
rs2105913	14	2.19e-05	1	173676742	INTRONIC	A	TNR	0	G	0.2406
rs11013005	15	2.38e-05	10	18536991	INTRONIC	T	CACNB2	0	C	0.2217
rs10809889	16	2.46e-05	9	13042851	INTERGENIC	C	RP11-382H24.2;OTTHUMG00000019560	-29960	G	0.4975
rs10027540	17	2.54e-05	4	185987834	UPSTREAM	G	ACSL1	-3625	G	0.3167
rs12757682	18	2.59e-05	1	197247864	INTERGENIC	T	AC096631.2	62285	C	0.1319
rs11521023	19	2.59e-05	7	114887926	INTRONIC	A	AC092590.2	120679	C	0.05911
rs7897562	20	2.65e-05	10	3834242	INTERGENIC	A	COPEB;KLF6	-16787	C	0.3552
rs11060108	21	2.69e-05	12	128116744	INTERGENIC	G	TMEM132D	5482	T	0.1642
rs4763527	22	2.88e-05	12	10628544	DOWNSTREAM	C	KLRA1	3800	T	0.1062
rs6712776	23	2.9e-05	2	3331456	INTRONIC	A	TSSC1	0	C	0.05064
rs12819066	24	2.93e-05	12	10567197	DOWNSTREAM	T	AC068775.52	197	C	0.08276
rs12097299	26	3.23e-05	1	239009755	INTRONIC	T	RGS7	0	C	0.1998
rs13100444	27	3.33e-05	3	142234554	INTERGENIC	T	SPSB4	-18390	A	0.4253
rs2310869	28	3.79e-05	3	142235624	INTERGENIC	A	SPSB4	-17320	C	0.4184
rs7023567	29	3.91e-05	9	23021321	INTERGENIC	G	OTTHUMG00000019694;RP11-370B11.1	283094	C	0.236
rs17148521	30	3.99e-05	10	10703943	INTERGENIC	A	RP1-186E20.1;OTTHUMG00000017659	154249	G	0.1465
rs2854214	31	4.23e-05	17	59299181	DOWNSTREAM	G	CSH2	3925	G	0.07915
rs1995097	32	4.28e-05	21	27286103	INTERGENIC	T	ADAMTS5	-25400	A	0.1672
rs2727330	33	4.37e-05	17	59279230	INTERGENIC	N/A	SMARCD2	-5569	G	0.09695
rs2584608	34	4.38e-05	17	59290442	INTERGENIC	C	CSH2	12664	A	0.07923
rs7766646	35	4.47e-05	6	3298708	INTRONIC	C	SLC22A23	0	G	0.4555
rs2813760	36	4.59e-05	1	90341949	INTERGENIC	G	ZNF326	75264	C	0.3663
rs6499083	37	4.6e-05	16	65022381	INTERGENIC	C	CDH5	26195	A	0.2125
rs1393084	38	4.67e-05	5	82828276	INTRONIC	T	CSPG2;VCAN	0	T	0.1245
rs1912492	39	4.7e-05	7	118134126	INTRONIC	T	ANKRD7	464149	C	0.4031
rs6842506	40	4.83e-05	4	176569534	INTERGENIC	G	AC131094.3	-61612	A	0.2305
rs16839247	41	4.85e-05	3	133632042	INTRONIC	A	DNAJC13	0	A	0.1061
rs11192967	42	5.01e-05	10	108329322	INTRONIC	C	SORCS1	0	C	0.1924
rs2532660	43	5.04e-05	10	119246133	INTERGENIC	T	EMX2	-45813	G	0.3246
rs2310868	44	5.05e-05	3	142235480	INTERGENIC	A	SPSB4	-17464	A	0.4172
rs12475373	45	5.07e-05	2	168960515	INTERGENIC	C	AC019086.7	44732	A	0.3909
rs12247456	46	5.21e-05	10	42908202	INTRONIC	G	RET	0	G	0.4631
rs6919	47	5.32e-05	17	59263217	3PRIME_UTR	A	SMARCD2	0	T	0.1052
rs11240732	48	5.33e-05	1	202612015	INTERGENIC	C	PLEKHA6	-16348	C	0.4017
rs2665850	49	5.44e-05	17	59307844	INTRONIC	C	CSH1	0	A	0.07635
rs6553872	50	5.47e-05	4	176562765	INTERGENIC	T	AC131094.3	-68381	G	0.2306
rs7594476	51	5.48e-05	2	139164070	INTERGENIC	C	NXPH2	-18353	G	0.1052
rs979438	52	5.64e-05	4	127663080	INTERGENIC	G	N/A	-9	C	0.3242
rs11957941	53	5.82e-05	5	177332854	INTERGENIC	C	AC136940.2	966	T	0.4828
rs10866376	54	6.35e-05	4	176571896	INTERGENIC	T	AC131094.3	-59250	T	0.2296
rs2665831	55	6.46e-05	17	59266124	INTRONIC	T	SMARCD2	0	C	0.07768
rs2665795	56	6.62e-05	17	59279004	INTERGENIC	N/A	SMARCD2	-5343	G	0.09754
rs12519623	57	6.65e-05	5	174470270	INTERGENIC	T	AC008413.7	-114930	C	0.2365
rs12547628	58	6.76e-05	8	12761935	INTERGENIC	T	C8orf79	-85619	G	0.1932
rs4122385	59	6.81e-05	3	189623347	INTRONIC	A	LPP	0	A	0.2662
rs10502084	60	7.09e-05	11	106573897	INTERGENIC	C	CWF19L2	128396	A	0.1362
rs4705928	61	7.11e-05	5	131606536	INTERGENIC	C	PDLIM4	-14750	A	0.2812
rs12152433	62	7.22e-05	3	145331510	INTERGENIC	T	AC022495.17	56926	C	0.1194
rs9481344	63	7.28e-05	6	113791122	INTERGENIC	C	OTTHUMG00000015397;RP1-132N8.1	139155	A	0.1313
rs6741800	64	7.33e-05	2	240657571	INTERGENIC	T	OR9S24P;OTTHUMG00000152395	-9952	G	0.1726
rs12268153	65	7.57e-05	10	8226274	INTERGENIC	T	GS1-756B1.1;OTTHUMG00000017644	-16955	G	0.04916
rs1442493	66	7.64e-05	4	100540388	INTERGENIC	N/A	ADH7	12053	T	0.2301
rs1322496	67	7.93e-05	1	167109282	INTERGENIC	C	RP11-375F2.1;OTTHUMG00000034587	-24716	C	0.03297
rs8041787	68	8.04e-05	15	89166481	INTERGENIC	T	BLM	6791	T	0.4029
rs13267838	69	8.16e-05	8	25252627	INTRONIC	T	PPP2R2A;DOCK5	0	T	0.02212
rs3802993	70	8.2e-05	12	11818798	INTRONIC	A	ETV6	0	G	0.04382
rs5762936	71	8.4e-05	22	27711377	INTRONIC	C	ZNRF3	0	A	0.2054
rs2044125	72	8.5e-05	17	59216916	INTRONIC	T	DDX42	0	C	0.07726
rs7137085	73	8.68e-05	12	27976396	INTERGENIC	A	PTHLH	25888	G	0.4921
rs9825224	74	8.99e-05	3	181158248	INTRONIC	A	PEX5L	0	C	0.294
rs4968661	75	9.15e-05	17	59150038	INTRONIC	C	AC046185.14	0	A	0.07662
rs968719	76	9.25e-05	17	59262003	SYNONYMOUS_CODING	T	PSMC5	0	C	0.07677
rs4661465	77	9.62e-05	1	14218131	INTRONIC	G	Z99291.1	0	T	0.3766
rs310882	78	9.76e-05	12	75913296	INTERGENIC	A	E2F7	25861	G	0.1507
